# Supplementary material for: Resistance of Leukemia Cells to 5-Azacytidine: Different Responses to the Same Induction Protocol
Source: MDPI journal article supplement (doi:10.3390/cancers15113063), 2023-06-05
Supplement: s1 [file s1]

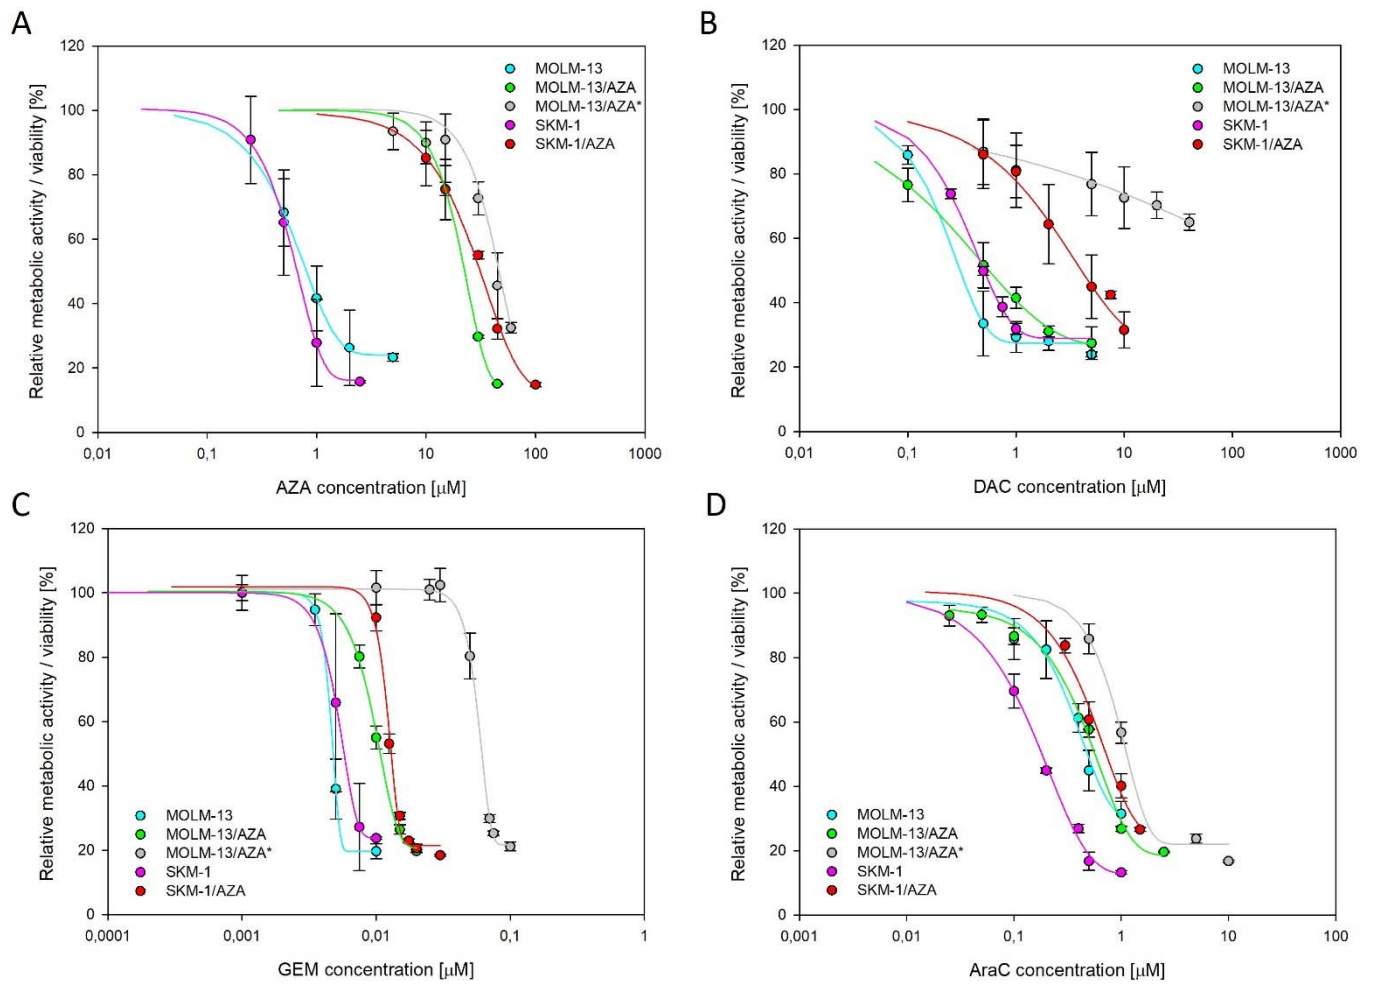

**Figure S1.** Dose response curves for the cell variants after 72 hours of cultivation with **A)** AZA and **B)** DAC added at various concentrations every 24 hours and after 48 hours of cultivation with **C)** GEM and **D)** AraC added once.

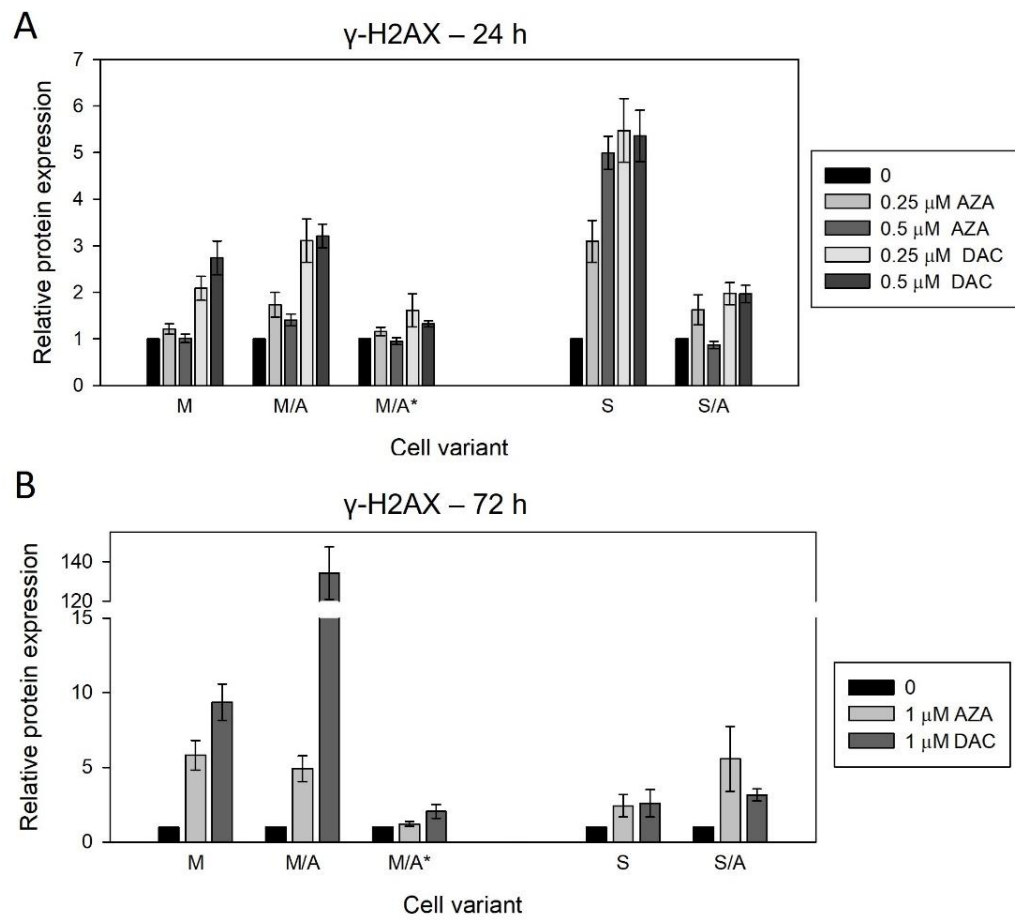

**Figure S2.** The optical densities of the  $\gamma$ -H2AX protein bands quantified by densitometry and summarized in the bar plots. The data were normalized to  $\alpha$ -TUB, and the protein levels in the cells cultured without the HMAs were set as 1. The data are expressed as the mean  $\pm$  SD of three independent measurements. **A)** 24-hour cultivation and **B)** 72-hour cultivation with either AZA or DAC.

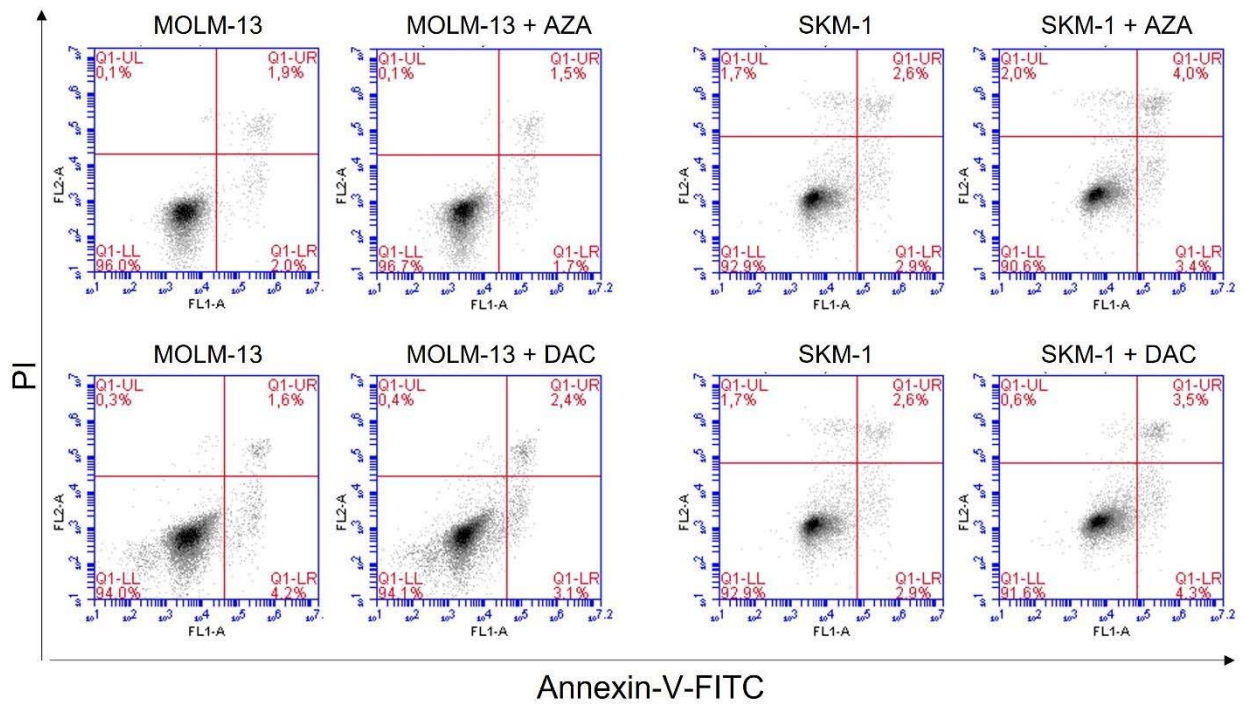

**Figure S3.** Representative dot plots of Annexin-V-FITC and PI assay for parental cell lines MOLM-13 and SKM-1 after 24-hour cultivation with or without 0.5  $\mu$ M AZA or DAC.

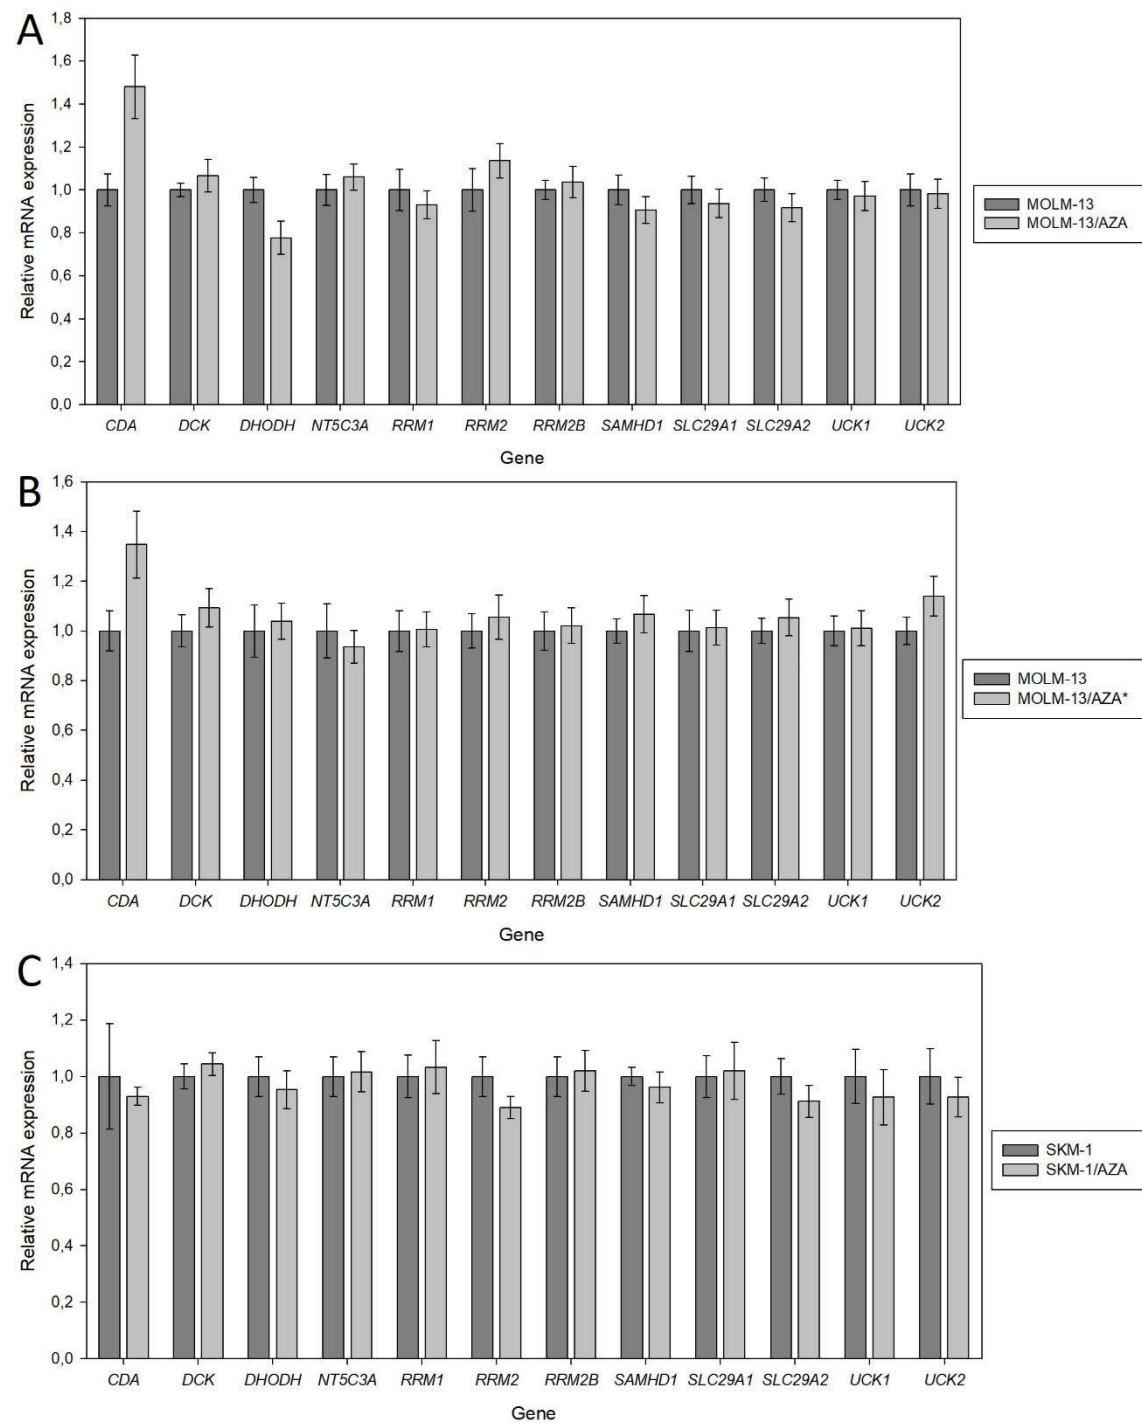

**Figure S4.** The optical densities of the PCR product bands were quantified and are summarized in bar plots. The data were normalized to *ACTB*, and the mRNA expression levels in parental cells were set as 1. The data are expressed as the mean  $\pm$  SD of three independent measurements. **A)** Comparison of mRNA gene expression in the MOLM-13/AZA cell variant and parental MOLM-13 cell line. **B)** Comparison of mRNA gene expression in the MOLM-13/AZA\* cell variant and parental MOLM-13 cell line. **C)** Comparison of mRNA gene expression in the SKM-1/AZA cell variant and parental SKM-1 cell line.

**Table S1.** Results of Pearson correlation analysis for correlation between data obtained by three different methods to determine the effect of TFN on each cell variant.

| Cell variant                                                                                                     | Correlation coefficient | P value               |
|------------------------------------------------------------------------------------------------------------------|-------------------------|-----------------------|
| <b>Number of viable cells (CASY cell counter) vs. metabolic activity (MTS assay)</b>                             |                         |                       |
| MOLM-13                                                                                                          | 0.924                   | $p \leq 0.05$         |
| MOLM-13/AZA                                                                                                      | 0.929                   | $p \leq 0.05$         |
| MOLM-13/AZA*                                                                                                     | 0.927                   | $p \leq 0.05$         |
| SKM-1                                                                                                            | 0.942                   | $p \leq 0.02$         |
| SKM-1/AZA                                                                                                        | 0.626                   | n.s. ( $p > 0.1$ )    |
| <b>Number of viable cells (CASY cell counter) vs. proportion of viable cells (unstained by Annexin V and PI)</b> |                         |                       |
| MOLM-13                                                                                                          | 0.923                   | $p \leq 0.05$         |
| MOLM-13/AZA                                                                                                      | 0.844                   | m.s. ( $p \leq 0.1$ ) |
| MOLM-13/AZA*                                                                                                     | 0.927                   | $p \leq 0.05$         |
| SKM-1                                                                                                            | 0.964                   | $p \leq 0.01$         |
| SKM-1/AZA                                                                                                        | 0.901                   | $p \leq 0.05$         |
| <b>Metabolic activity (MTS assay) vs. proportion of viable cells (unstained by Annexin V and PI)</b>             |                         |                       |
| MOLM-13                                                                                                          | 0.997                   | $p \leq 0.001$        |
| MOLM-13/AZA                                                                                                      | 0.587                   | n.s. ( $p > 0.1$ )    |
| MOLM-13/AZA*                                                                                                     | 0.918                   | $p \leq 0.05$         |
| SKM-1                                                                                                            | 0.994                   | $p \leq 0.001$        |
| SKM-1/AZA                                                                                                        | 0.635                   | n.s. ( $p > 0.1$ )    |

n.s. – not significant, m.s. – marginally significant
